# Supplementary material for: Facile synthesis of lactoferrin conjugated ultra small large pore silica nanoparticles for the treatment of glioblastoma
Source: Royal Society of Chemistry journal article supplement (doi:10.1039/d1nr03553c), 2021-01-01
Supplement: d1nr03553c4.pdf [file d1nr03553c4.pdf]

Full linear correlation analysis of USLP uptake in glioblastoma U87 spheroids.

(A) Video time-course of single z-stack of USLP-NH<sub>2</sub>-CY5 uptake in glioblastoma spheroids, relative to linear correlation (yellow line).

(B) Video time-course of single z-stack of USLP-NH<sub>2</sub>-CY5-Lf uptake in glioblastoma spheroids, relative to linear correlation (yellow line).
